# Supplementary material for: Influence of Porous Dressings Based on Butyric-Acetic Chitin Co-Polymer on Biological Processes In Vitro and In Vivo
Source: PubMed Central journal article supplement (PMC6471426; doi:10.3390/ma12060970), 2019-03-23
Supplement: materials-12-00970-s001.pdf [file materials-12-00970-s001.pdf]

# Influence of porous dressings based on butyric-acetic chitin co-polymer on biological processes *in vitro* and *in vivo*

Witold Sujka <sup>1,\*</sup>, Zbigniew Draczynski <sup>2</sup>, Beata Kolesinska <sup>3</sup>, Ilona Latanska <sup>1</sup>, Zenon Jastrzebski <sup>4</sup>, Zbigniew Rybak <sup>5</sup> and Boguslawa Zywicka <sup>5</sup>

<sup>1</sup> Tricomed S.A., Lodz, Świetojańska 5/9, 93-493 Lodz, Poland; Witold.Sujka@tricomed.com, Ilona.Latanska@tricomed.com

<sup>2</sup> Department of Material and Commodity Sciences and Textile Metrology, Lodz University of Technology, Żeromskiego 116, 90-924 Lodz, Poland; zbigniew.draczynski@p.lodz.pl

<sup>3</sup> Institute of Organic Chemistry, Lodz University of Technology, Żeromskiego 116, 90-924 Lodz, Poland; beata.kolesinska@p.lodz.pl

<sup>4</sup> Narodowy Instytut Leków, Chełmska 30/34 00-725 Warsaw, Poland; z.jastrzebski@nil.gov.pl

<sup>5</sup> Department of Experimental Surgery and Biomaterial Research, Wrocław Medical University, Bujwida Street 44, 50-368 Wrocław, Poland; zbigniew.rybak@umed.wroc.pl, boguslawa.zywicka@umed.wroc.pl

\* Correspondence: Witold.Sujka@tricomed.com; Tel.: +48-42-689--6521

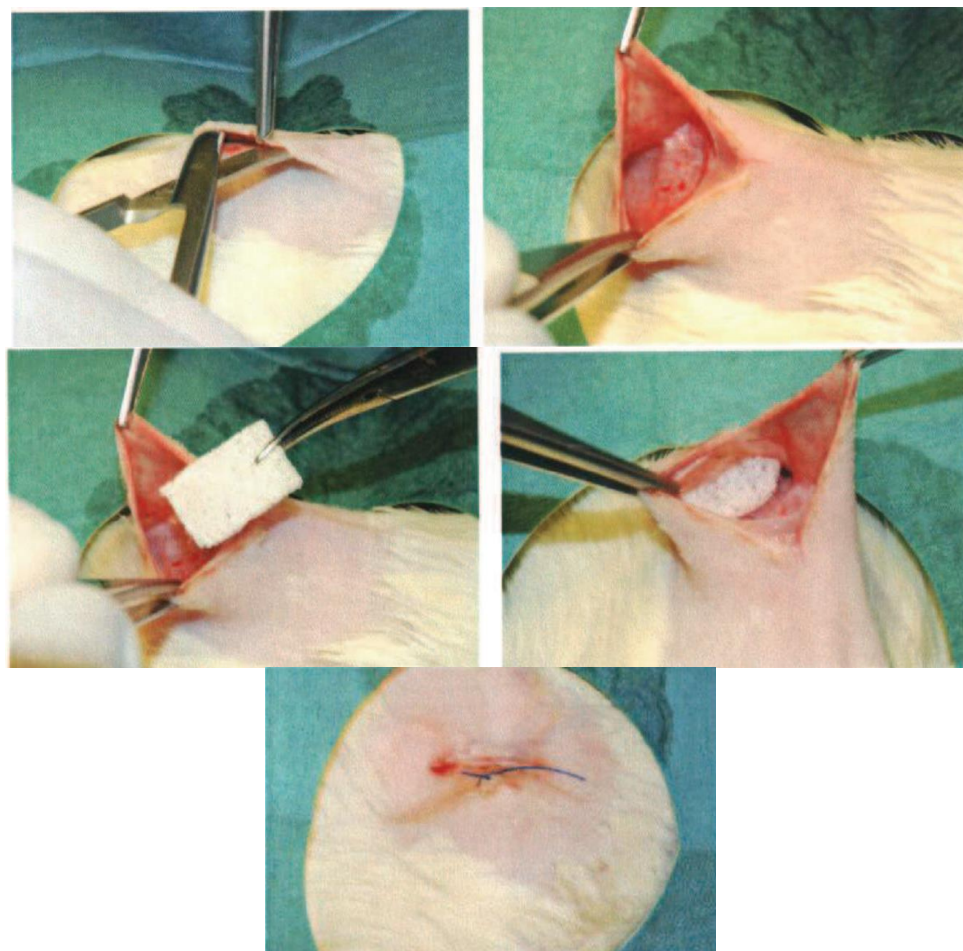

**Figure S1.** Intraoperative image. Medisorb R dressing implantation in the subcutaneous tissue in the rat abdominal cavity.

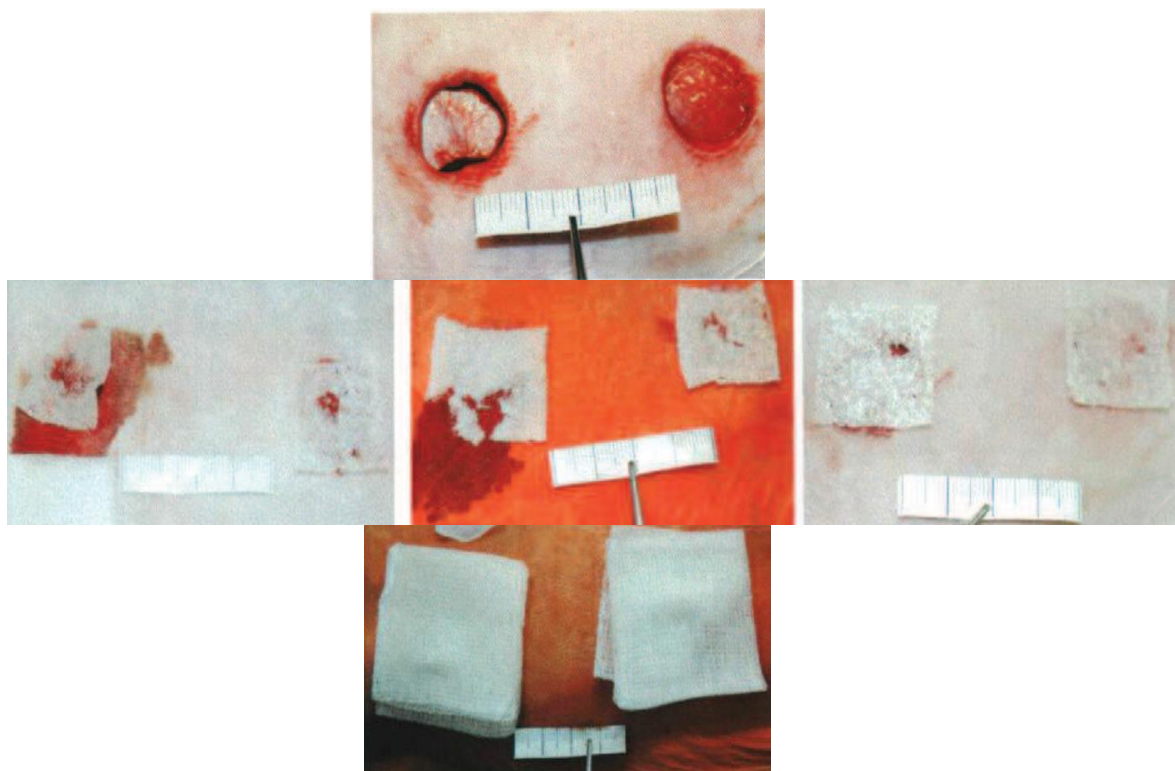

**Figure S2.** Intraoperative image (top panel). Rabbit skin loss of full thickness. Initial post-operative wound healing: Medisorb (middle panel) and gauze control dressing (bottom panel).

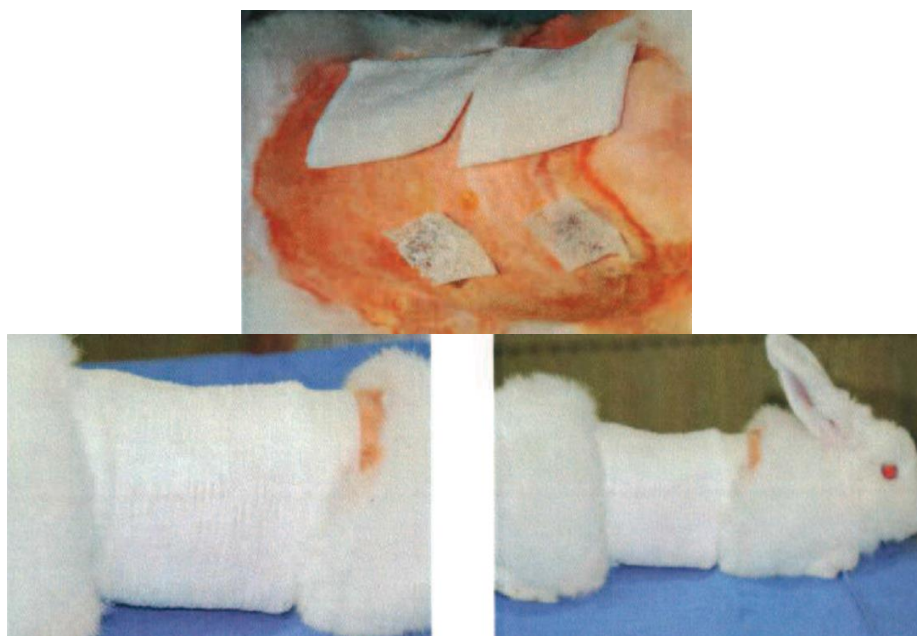

**Figure S3.** Wound supplying with Medisorb R and gauze control dressing (top panel). Wound supplying with the knitted band (bottom panel).

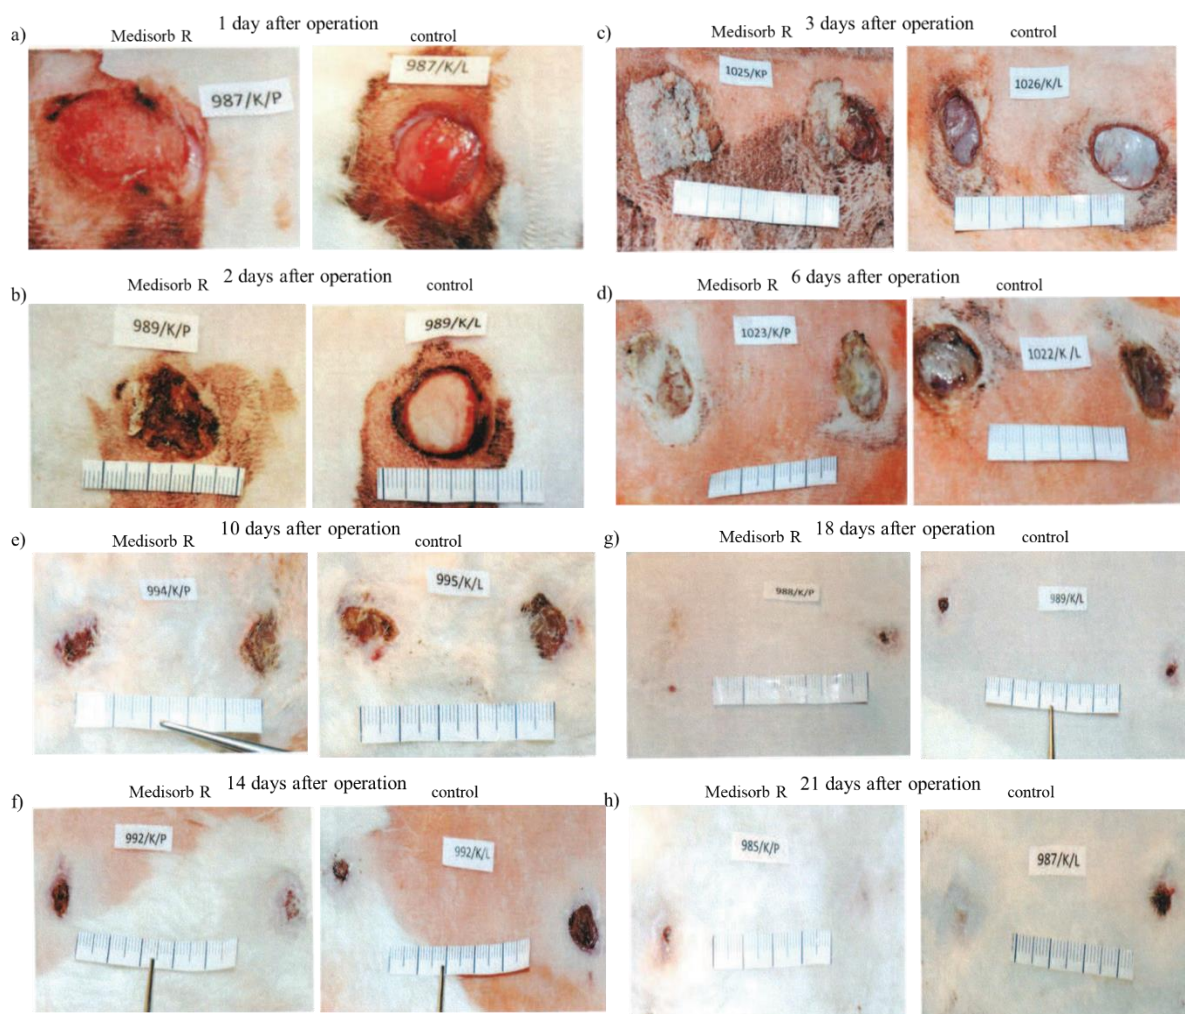

**Figure S4.** Macroscopic images of operational skin loss in rabbits, 1, 2, 3,6, 10, 14, 18 and 21 days after operation. The wounds were treated with Medisorb R dressing and gauze dressing as control.
